# Supplementary material for: Cytokine-Laden Extracellular Vesicles Predict Patient Prognosis after Cerebrovascular Accident
Source: MDPI journal article supplement (doi:10.3390/ijms22157847), 2021-07-22
Supplement: s1 [file s1]

### Glasgow Coma Scale (GCS)

| Component            | Response         | Score |
|----------------------|------------------|-------|
| Eye Opening          | Spontaneous      | 4     |
|                      | To speech        | 3     |
|                      | To pain          | 2     |
|                      | None             | 1     |
| Best Verbal Response | Oriented         | 5     |
|                      | Confused         | 4     |
|                      | Inappropriate    | 3     |
|                      | Incomprehensible | 2     |
|                      | None             | 1     |
| Best Motor Response  | Obeying          | 6     |
|                      | Localizes        | 5     |
|                      | Withdraws        | 4     |
|                      | Flexion          | 3     |
|                      | Extension        | 2     |
|                      | None             | 1     |

### Glasgow Outcome Scale-Extended (GOSE)

| GOSE 8-point scale            | Domain                                                                | Criteria                                                                                  |
|-------------------------------|-----------------------------------------------------------------------|-------------------------------------------------------------------------------------------|
| 1 = Dead                      |                                                                       | Dead                                                                                      |
| 2 = Vegetative state          | Consciousness                                                         |                                                                                           |
| 3 = Lower severe disability   | Function in Home                                                      | Unable to look after themselves for 8 h                                                   |
| 4 = Upper severe disability   | Function in Home<br>Function Outside the Home                         | Unable to look after themselves for 24 h OR<br>Unable to shop OR<br>Unable to travel      |
| 5 = Lower moderate disability | Work/Study<br>Social and Leisure Activities<br>Family and Friendships | Unable to work/study OR<br>Unable to participate OR<br>Constant problems                  |
| 6 = Upper moderate disability | Work<br>Social and Leisure Activities<br>Family and Friendships       | Reduced work capacity OR<br>Participate much less OR<br>Frequent problems                 |
| 7 = Lower good recovery       | Social and Leisure Activities<br>Family and Friendships<br>Symptoms   | Participate a bit less OR<br>Occasional problems OR<br>Some symptoms affecting daily life |
| 8 = Upper good recovery       |                                                                       | No problems                                                                               |
