# Supplementary material for: Cytokine-Laden Extracellular Vesicles Predict Patient Prognosis after Cerebrovascular Accident
Source: Int J Mol Sci. 2021 Jul 22;22(15):7847. doi: 10.3390/ijms22157847 (PMC8345931; doi:10.3390/ijms22157847)
Supplement: Supplementary file 1 [file ijms-22-07847-s001.zip]

Archive with 9 entries (9 files):
- Supp Figure S1.tif
- Supp Figure S2.tif
- Supp Figure S3.tif
- Supp Figure S4.tif
- Supp Table S1.tif
- Supp Table S2 new.pdf
- Supp Table S3.tif
- Supp Table S3.xlsx
- Supplemental Table S1 excel.xlsx
