# Supplementary material for: Cytokine-Laden Extracellular Vesicles Predict Patient Prognosis after Cerebrovascular Accident
Source: Int J Mol Sci. 2021 Jul 22;22(15):7847. doi: 10.3390/ijms22157847 (PMC8345931; doi:10.3390/ijms22157847)
Supplement: Supplementary file 1 [file ijms-22-07847-s001.zip › Supp Table S3.xlsx]

## Sheet: EV lumen
Patient	Pos	Neg	ENA-78	G-CSF	GM-CSF	GRO	GRO-alpha	I-309	IL-1alpha	IL-1beta	IL-2	IL-3	IL-4	IL-5	IL-6	IL-7	IL-8	IL-10	IL12-p40	IL-13	IL-15	IFN-gamma	MCP-1	MCP-2	MCP-3	M-CSF	MDC	MIG	MIP-1 beta	MIP-1-delta	RANTES	SCF	SDF-1	TARC	TGF-beta 1	TNF-alpha	TNF-beta	EGF	IGF-1	Angiogenin	Oncostatin M	TPO	VEGF	PDGF-BB	Leptin	BDNF	BLC	CK beta 8-1	Eotaxin
1	62.92	0.38	13.51	3.75	7.5	15.01	16.51	3	7.5	15.01	16.51	20.26	10.51	10.51	9.01	9.01	30.02	12.76	12.01	4.5	22.51	21.76	34.52	12.01	14.26	30.02	18.76	15.01	30.77	3	24.77	18.01	17.26	40.53	20.26	33.77	45.78	23.27	21.01	8.26	33.02	15.01	29.27	15.01	30.77	42.78	23.27	22.51	33.02
2	62.92	26.7	39.96	18.6	20.81	28.17	21.55	28.17	51.01	64.27	59.85	57.64	35.54	27.44	20.07	16.39	41.43	8.29	39.96	33.33	55.43	53.22	50.27	26.7	21.55	37.01	23.75	17.86	26.7	20.81	45.12	39.96	37.75	37.75	24.49	35.54	37.75	27.44	23.02	2.39	43.64	31.86	37.01	25.23	31.86	51.01	30.38	25.96	24.49
3	62.92	17.81	41.69	23.5	25.02	27.29	13.64	12.89	25.77	34.11	37.14	46.24	30.32	29.56	21.98	17.43	40.18	6.06	21.22	15.92	41.69	37.14	50.03	28.05	30.32	47.76	28.05	18.95	21.98	5.31	41.69	34.11	35.63	59.88	40.18	50.79	61.4	37.9	31.08	0	37.14	22.74	41.69	25.77	51.55	65.19	44.72	37.9	44.72
4	62.92	7.01	18.91	10.37	9.76	12.81	14.03	4.27	10.37	16.47	21.34	21.95	17.69	20.13	12.81	8.54	34.15	5.49	15.25	12.2	21.34	27.44	31.1	16.47	17.08	31.71	20.74	15.25	34.76	4.27	31.1	20.13	20.13	21.34	19.52	25	47.57	15.86	10.98	0	32.93	18.91	30.49	9.76	20.13	37.2	12.81	13.42	9.15
5	62.92	4.18	4.94	0	0	0	0	0	6.46	44.43	67.22	39.88	6.46	17.09	0	0	9.49	0	50.51	27.72	65.7	62.66	50.51	9.49	1.9	6.46	0	0	20.13	21.65	62.66	26.2	24.69	20.13	20.13	21.65	0	1.9	0	0	71.78	38.36	35.32	11.01	11.01	53.55	0	0	0
6	62.92	34.55	49.05	45.33	54.25	46.07	46.82	0	8.17	19.32	28.98	31.95	29.72	37.9	37.16	31.95	61.68	18.58	0	0	13.38	20.81	25.27	18.58	23.78	46.82	26.75	19.32	35.67	0	4.46	0.74	7.43	14.12	24.52	30.47	47.56	28.98	19.32	5.94	5.2	0	11.15	6.69	20.06	43.84	20.81	26.01	26.01
7	62.92	9.2	21.46	16.2	21.46	28.47	54.74	19.71	24.96	21.46	52.99	40.73	21.46	28.47	19.71	17.96	121.31	16.2	37.22	12.7	24.96	24.96	26.71	14.45	17.96	44.23	21.46	19.71	81.02	3.94	30.22	7.44	12.7	12.7	26.71	33.72	33.72	37.22	19.71	5.69	65.25	5.69	16.2	0.44	7.44	77.51	2.19	7.44	10.95
8	62.92	11.02	17.63	23.5	34.52	41.86	57.29	38.93	42.6	41.86	46.27	22.03	9.55	22.03	27.17	31.58	64.63	45.54	49.94	40.39	40.39	33.78	24.97	8.08	18.36	43.33	34.52	39.66	55.08	38.93	48.47	29.38	28.64	24.24	23.5	33.78	30.85	32.32	26.44	27.91	53.61	35.25	35.25	24.24	23.5	51.41	16.16	16.89	17.63
9	62.92	22.31	28.33	25.32	32.34	32.34	25.32	18.3	20.3	27.32	26.32	25.32	20.3	22.31	22.31	26.32	104.53	15.29	22.31	10.28	18.3	14.29	13.29	15.29	17.3	29.33	17.3	15.29	18.3	0	8.27	4.26	6.27	8.27	11.28	9.27	8.27	14.29	6.27	0	15.29	9.27	17.3	4.26	12.28	34.34	5.26	2.26	0.25
10	62.92	27.35	39.97	38.44	45.32	39.97	52.21	0	6.31	18.55	30.02	28.49	26.96	35.38	33.85	29.26	58.33	25.43	0	0.96	16.26	22.37	25.43	18.55	23.14	53.74	26.2	21.61	48.38	0	9.37	7.84	14.73	19.31	32.32	39.97	39.97	29.26	17.02	9.37	25.43	15.49	23.14	14.73	25.43	62.15	33.08	30.79	20.84
11	62.92	13.68	39.8	36.69	40.42	47.27	31.72	7.46	14.3	23.63	20.52	31.1	33.58	38.56	42.29	41.05	58.46	28.61	4.98	2.49	16.17	16.79	21.14	27.36	34.21	51.62	41.67	31.72	32.96	0	8.08	5.6	13.06	19.9	20.52	23.01	26.12	30.47	27.36	11.82	6.84	1.87	8.08	6.22	19.9	41.05	32.34	31.1	24.25
12	62.92	0	10.03	4.56	8.21	10.03	22.8	0	4.56	10.03	22.8	31.91	6.38	30.09	17.32	11.85	35.56	13.68	0	0	2.74	6.38	2.74	0	0	24.62	8.21	10.03	24.62	0	0	0	0	0	0	0	0	13.68	8.21	0	10.03	0	0	0	0	33.74	0	0	0
13	62.92	0	12.24	3.22	0.64	0	0	0	7.09	14.82	35.43	25.12	18.68	28.99	14.82	0	13.53	0	16.1	12.24	38.01	47.03	43.16	17.39	18.68	30.28	1.93	0	0	0	31.57	19.97	28.99	36.72	50.89	44.45	58.62	13.53	0	0	56.05	32.85	63.78	36.72	52.18	83.1	35.43	31.57	23.84
14	62.92	11.87	24.57	13.92	19.65	18.83	18.02	4.09	16.38	25.39	26.2	30.3	19.65	26.2	21.29	17.2	47.49	1.64	21.29	17.2	28.66	29.48	32.75	20.47	18.83	46.68	25.39	22.11	30.3	6.55	45.86	24.57	27.84	29.48	46.68	48.31	47.49	37.67	23.75	0	51.59	37.67	45.86	31.94	40.94	84.34	45.86	44.22	36.03
15	62.92	17.02	19.39	8.73	11.1	11.1	15.84	16.43	24.13	34.79	38.93	21.17	13.47	15.25	9.92	6.37	29.46	2.81	5.77	7.55	19.99	21.76	21.17	7.55	7.55	22.35	12.29	6.37	22.35	0	9.92	4.59	6.37	6.96	11.1	14.06	16.43	10.51	6.96	0	12.88	2.81	10.51	1.63	5.18	29.46	6.96	6.37	4
16	62.92	23.13	18.93	21.03	24.19	11.57	3.15	24.19	37.86	42.06	52.58	33.65	26.29	27.34	19.98	13.67	32.6	0	34.7	41.01	51.53	51.53	48.37	32.6	26.29	27.34	10.52	4.21	0	29.44	49.42	47.32	50.47	49.42	55.73	37.86	29.44	15.77	3.15	0	58.89	48.37	62.04	51.53	49.42	68.35	30.49	23.13	10.52
17	62.92	19.91	35.93	16.88	23.81	41.13	38.53	13.42	22.08	32.47	31.6	38.53	20.35	16.88	12.55	12.55	45.46	15.15	24.68	12.55	31.6	26.41	31.6	10.82	10.82	31.6	16.88	17.75	29.87	5.63	37.66	25.54	23.81	29.87	16.02	29.01	30.74	23.81	18.62	5.63	30.74	17.75	26.41	15.15	22.94	47.19	24.68	19.48	17.75
18	62.92	0	23.13	7.36	18.93	33.65	34.7	4.21	16.82	39.96	39.96	33.65	9.46	21.03	10.52	7.36	39.96	0	19.98	0	27.34	34.7	26.29	0	0	29.44	15.77	19.98	22.08	0	22.08	2.1	18.93	4.21	3.15	13.67	15.77	26.29	13.67	0	24.19	0	3.15	0	0	38.91	4.21	3.15	9.46
19	62.92	13.79	22.87	19.38	19.38	13.1	6.11	34.75	34.75	31.25	32.65	24.27	15.19	20.78	14.49	7.51	37.54	0	37.54	24.27	31.25	29.16	24.97	12.4	16.59	21.48	6.81	2.62	18.68	17.29	29.86	18.68	15.19	13.1	17.29	23.57	17.29	15.89	3.32	0	34.05	16.59	15.89	4.71	6.11	29.86	8.9	7.51	4.71
20	62.92	24.2	24.68	23.71	21.78	14.04	2.42	17.91	20.81	23.71	22.75	22.75	23.71	25.65	24.68	20.81	20.81	1.45	10.16	7.26	11.13	12.1	13.07	15	19.84	25.65	14.04	8.23	3.39	4.36	9.2	11.13	15	16.94	15	16.94	17.91	17.91	7.26	0	10.16	7.26	18.88	16.94	19.84	27.59	15	21.78	21.78
21	62.92	26.22	26.22	22.4	21.45	8.1	0	46.23	44.33	38.61	37.65	24.31	21.45	25.26	21.45	16.68	31.93	0	20.5	15.73	18.59	15.73	19.54	13.82	15.73	25.26	10.01	2.38	0	0.48	9.06	7.15	8.1	9.06	18.59	15.73	12.87	5.24	0	0	19.54	3.34	8.1	1.43	0.48	29.08	0	0	0
22	62.92	3.77	5.18	1.41	0	0	0	9.88	14.59	19.3	26.83	17.42	12.71	18.36	14.59	8.94	12.71	0	22.12	17.42	25.89	24.95	24.95	17.42	23.06	40.95	18.36	3.29	0	5.18	24.01	15.53	15.53	21.18	37.19	35.3	36.24	25.89	3.29	0	46.6	11.77	27.77	11.77	21.18	71.08	27.77	27.77	24.01
23	62.92	6.6	10.49	2.72	11.26	12.82	0	12.04	17.48	22.14	27.57	21.36	19.03	22.14	19.03	15.92	39.23	9.71	16.7	20.58	29.9	29.9	27.57	19.81	19.81	37.67	22.91	22.14	28.35	5.05	19.81	20.58	20.58	21.36	26.02	29.9	29.9	26.02	13.59	4.27	26.02	8.16	23.69	17.48	19.81	50.88	19.03	18.25	17.48
2	62.92	7.02	0	0	0	0	9.22	20.79	24.09	33.45	40.61	25.19	11.98	5.37	3.17	0	26.3	3.72	29.6	24.64	37.86	36.21	36.21	17.48	7.57	24.64	11.98	10.88	23.54	31.25	36.76	29.6	34.56	34.56	37.86	27.4	26.3	27.95	15.83	7.57	54.93	34.56	41.16	37.86	41.71	59.89	18.59	20.79	24.64
2	62.92	32.18	30.15	35.22	32.18	21.03	12.92	19	22.04	30.15	36.23	37.24	36.23	41.3	49.4	44.34	33.19	7.85	16.97	17.99	31.16	37.24	35.22	39.27	44.34	59.54	46.36	22.04	0	0	10.89	20.02	28.12	30.15	36.23	35.22	38.26	40.28	11.91	0	6.84	2.79	20.02	24.07	36.23	51.43	27.11	28.12	23.06
26	62.92	8.09	16.68	14.7	18	25.27	20.64	18.66	19.98	24.61	15.36	19.32	15.36	17.34	18.66	18.66	24.61	14.04	24.61	20.64	21.3	16.68	16.02	19.32	21.96	29.23	23.94	19.32	21.96	16.68	32.53	22.62	21.96	21.96	22.62	24.61	25.27	31.21	27.91	14.04	31.21	23.28	27.25	20.64	22.62	34.51	29.23	29.23	31.21
27	62.92	40.02	57.94	61.52	72.27	63.91	66.3	0	1.79	19.71	37.63	35.24	35.24	42.41	47.19	48.38	91.39	41.21	0	0	16.13	22.1	23.3	18.52	23.3	51.97	35.24	36.44	63.91	0	0.6	0.6	6.57	0	20.91	28.07	36.44	32.85	26.88	18.52	6.57	0	12.54	5.38	18.52	55.55	23.3	24.49	26.88
28	62.92	19.22	26.43	27.11	36.03	35.35	34.66	41.53	34.66	36.03	47.02	33.98	22.31	32.6	29.86	26.43	51.82	18.19	53.88	34.66	42.21	38.78	36.03	21.62	24.37	40.84	22.31	17.5	27.8	37.41	47.02	31.92	33.98	30.54	29.86	31.23	27.11	26.43	12.01	7.89	64.18	39.47	40.15	26.43	27.11	51.13	13.38	14.07	14.07
29	62.92	37.49	55.9	61.16	74.32	61.16	13.81	5.92	19.07	32.23	37.49	50.64	63.79	76.95	82.21	90.1	84.84	29.59	0.66	11.18	26.96	32.23	45.38	63.79	74.32	79.58	66.42	50.64	26.96	0	5.92	13.81	24.33	34.86	50.64	53.27	50.64	48.01	29.59	16.44	21.7	16.44	32.23	26.96	50.64	76.95	50.64	48.01	32.23
30	62.92	15.3	22.34	22.34	21.64	22.34	8.27	11.08	16.01	19.53	15.3	22.34	20.93	21.64	22.34	22.34	73	9.67	15.3	12.49	16.01	16.71	19.53	20.93	19.53	27.97	19.53	16.71	13.19	6.16	13.19	11.79	16.71	20.23	23.04	20.23	20.93	23.04	14.6	6.16	25.86	21.64	26.56	25.15	45.56	50.49	30.08	34.3	31.49
31	62.92	15.16	22.74	14.9	17.52	15.42	4.97	27.97	30.59	32.16	31.63	24.84	14.9	18.56	14.38	9.67	34.77	0	29.54	25.88	30.59	30.59	25.88	9.67	10.2	26.4	11.24	4.97	18.56	15.42	36.34	22.22	17.52	14.9	13.33	15.42	35.29	10.72	4.44	0	38.95	22.22	27.45	8.63	11.76	31.11	5.49	5.49	1.83
Controls
1	62.92	26.25	39.3	33.71	39.3	37.44	41.79	13.2	20.66	28.74	42.41	36.2	26.25	33.09	29.36	26.88	52.35	21.28	25.63	15.69	31.85	34.95	35.58	21.9	22.53	33.09	21.28	26.25	39.92	5.13	25.63	14.45	18.18	19.42	26.88	34.95	32.47	30.6	20.04	9.48	27.5	16.31	23.15	16.31	21.9	46.14	27.5	28.12	25.01
2	62.9167	0	18.2661	4.56653	19.7883	30.4435	22.8327	0	9.13306	21.3105	22.8327	27.3992	4.56653	19.7883	3.04435	6.08871	41.0988	0	9.13306	1.52218	16.744	30.4435	18.2661	3.04435	0	33.4879	9.13306	15.2218	22.8327	0	25.877	6.08871	18.2661	4.56653	7.61089	18.2661	12.1774	22.8327	10.6552	0	3.04435	0	7.61089	0	1.52218	44.1431	6.08871	0	12.1774
3	62.92	0	10.03	4.56	8.21	10.03	22.8	0	4.56	10.03	22.8	31.91	6.38	30.09	17.32	11.85	35.56	13.68	0	0	2.74	6.38	2.74	0	0	24.62	8.21	10.03	24.62	0	0	0	0	0	0	0	0	13.68	8.21	0	10.03	0	0	0	0	33.74	0	0	0
4	62.92	10.91	40.91	15.82	37.64	48.55	61.64	32.19	35.46	51.82	63.83	69.28	26.73	38.73	23.46	15.82	100.92	26.73	68.19	22.37	58.37	59.46	56.19	20.18	19.09	47.46	23.46	30	98.74	21.28	75.83	25.64	31.09	28.91	39.82	50.73	43.1	45.28	39.82	21.28	72.55	21.28	28.91	16.91	25.64	75.83	32.19	24.55	26.73
5
6	62.9167	0	4.17127	6.25691	16.6851	14.5994	8.34254	0	0	6.25691	14.5994	8.34254	0	16.6851	0	0	16.6851	0	0	0	0	10.4282	2.08564	0	0	14.5994	0	0	6.25691	0	0	0	0	0	6.25691	0	2.08564	0	0	0	0	0	0	0	0	37.5414	0	0	0
7	62.92	30.77	44.9	44.9	58.2	68.18	68.18	0	14.97	38.25	33.26	43.24	39.91	43.24	44.9	48.23	74.83	63.19	44.9	29.93	43.24	33.26	31.6	36.59	44.9	71.51	61.53	59.87	79.82	4.99	43.24	29.93	33.26	34.92	43.24	48.23	54.88	69.85	59.87	43.24	8.31	6.65	31.6	14.97	31.6	84.81	38.25	41.57	41.57
8	62.92	26.58	37.22	22.79	23.55	13.67	2.28	20.51	28.1	40.26	38.74	37.22	25.07	25.07	20.51	13.67	26.58	0	22.79	18.99	34.18	30.38	31.14	17.47	14.43	29.62	13.67	1.52	7.6	6.08	30.38	18.23	18.23	17.47	18.99	17.47	15.19	7.6	0.76	0	26.58	14.43	22.03	10.63	14.43	40.26	7.6	6.84	0
9	62.92	0	0	0	0	0	0	10.18	0	0	10.18	8.48	6.79	10.18	16.12	15.27	33.08	0	17.81	4.24	16.12	30.54	33.08	19.51	16.12	44.96	39.02	27.99	32.24	18.66	17.81	25.45	44.11	43.26	41.57	39.87	50.9	54.29	36.48	24.6	49.2	22.9	49.2	55.14	60.23	91.62	43.26	60.23	60.23
10	62.92	0	3.88	6.27	14.04	6.87	15.23	31.96	31.96	31.96	33.75	11.05	3.88	15.23	16.43	17.62	41.51	13.44	47.49	36.14	42.71	28.37	21.2	6.87	15.83	38.53	25.98	20.01	32.55	36.73	48.68	33.15	24.79	15.83	25.98	32.55	15.83	25.98	18.22	15.23	54.65	37.93	40.32	22.4	17.62	49.28	14.63	0	17.02
11	62.9167	0	14.967	1.663	11.641	21.6189	16.63	0	11.641	21.6189	18.293	8.31498	0	4.98899	0	1.663	23.2819	0	0	0	6.65198	13.304	0	0	0	18.293	1.663	4.98899	9.97797	0	8.31498	0	0	0	0	1.663	1.663	8.31498	3.32599	0	0	0	0	0	0	18.293	0	0	0
12	62.92	11.46	24.12	12.06	25.33	22.92	41.01	28.95	39.8	43.42	63.92	48.24	21.71	28.95	13.27	9.65	75.98	4.82	50.65	25.33	43.42	45.83	42.21	18.09	14.47	30.15	20.5	13.27	50.65	10.85	55.48	24.12	21.71	19.3	30.15	36.18	27.74	39.8	15.68	7.24	55.48	22.92	28.95	19.3	15.68	63.92	13.27	14.47	12.06
13	62.9167	0	13.6446	1.51606	4.54819	10.6124	0	0	16.6767	36.3855	37.9016	31.8373	3.03213	13.6446	0	0	18.1928	0	0	0	7.58032	24.257	7.58032	0	0	16.6767	0	0	0	0	3.03213	0	1.51606	0	0	0	0	0	0	0	0	0	0	0	0	10.6124	0	0	0
14	62.92	13.73	19.78	22.58	31.89	29.09	27.23	0	0	12.34	36.54	21.64	14.2	21.64	22.58	20.71	63.54	16.99	15.13	3.03	16.99	24.44	23.51	10.47	16.06	33.75	22.58	20.71	38.4	2.09	15.13	6.75	9.54	9.54	16.99	33.75	28.16	34.68	17.92	3.03	21.64	6.75	9.54	1.16	3.03	36.54	4.89	15.13	16.06
15	62.92	0	10.44	10.44	20.89	23.87	37.3	0	2.98	13.43	23.87	20.89	4.48	19.4	8.95	8.95	31.33	5.97	13.43	0	17.91	17.91	10.44	0	0	29.84	10.44	10.44	14.92	0	7.46	0	5.97	0	4.48	7.46	5.97	22.38	10.44	0	16.41	0	5.97	0	1.49	55.21	1.49	7.46	13.43
[truncated: 33 more columns]

## Sheet: EV surf
Patient	Pos	Neg	ENA-78	G-CSF	GM-CSF	GRO	GRO-alpha	I-309	IL-1alpha	IL-1beta	IL-2	IL-3	IL-4	IL-5	IL-6	IL-7	IL-8	IL-10	IL12-p40	IL-13	IL-15	IFN-gamma	MCP-1	MCP-2	MCP-3	M-CSF	MDC	MIG	MIP-1 beta	MIP-1-delta	RANTES	SCF	SDF-1	TARC	TGF-beta 1	TNF-alpha	TNF-beta	EGF	IGF-1	Angiogenin	Oncostatin M	TPO	VEGF	PDGF-BB	Leptin	BDNF	BLC	CK beta 8-1	Eotaxin
1	62.92	25.49	32.82	17.49	11.49	17.49	0.83	20.82	26.16	40.15	32.15	38.15	28.82	19.49	12.83	6.83	10.16	0	28.15	19.49	32.15	31.49	28.15	24.82	18.83	26.16	10.16	0	1.5	18.16	39.48	36.15	42.15	34.82	23.49	17.49	12.83	11.49	7.5	0	42.81	38.15	44.15	34.82	35.48	42.15	18.16	12.16	12.16
2	62.92	16.74	29.22	17.4	23.31	46.94	29.87	0	0	17.4	18.71	23.96	18.71	16.08	16.74	20.02	35.78	16.08	0	0	11.49	17.4	16.08	14.77	16.74	33.81	24.62	20.68	36.44	0	9.52	8.86	26.59	23.31	16.08	15.43	21.34	28.56	33.15	17.4	2.95	2.95	16.74	18.05	31.84	34.47	31.18	33.15	33.15
3	62.92	1.27	13.41	0	0.99	15.67	16.24	27.53	15.67	27.53	14.54	21.32	9.46	0	0	3.81	23.01	10.02	32.61	11.72	20.75	13.98	8.89	4.94	2.12	23.01	15.67	10.02	34.31	22.45	32.61	20.19	21.88	15.67	0	0	6.64	13.41	21.88	13.41	41.08	20.19	24.71	12.85	14.54	23.58	11.72	15.11	20.75
4	62.92	0	5.25	0	0	4.02	0	6.49	6.49	22.55	10.19	11.43	2.78	0	0	0	0	0	16.37	4.02	17.61	11.43	2.78	0.31	0.31	10.19	0	0	0.31	4.02	27.49	13.9	18.84	12.67	4.02	2.78	4.02	1.54	4.02	0	36.14	18.84	17.61	7.72	16.37	26.26	16.37	13.9	2.78
5	62.92	0.2	11.1	2.22	9.49	30.48	21.6	0	0	10.3	5.45	12.72	5.45	2.22	3.03	7.87	24.02	14.33	0	0	6.26	6.26	5.45	7.07	7.07	20.79	15.95	12.72	28.06	0	11.91	7.87	13.53	14.33	11.91	12.72	16.76	20.79	28.06	12.72	10.3	7.87	17.56	10.3	19.99	28.87	27.25	28.87	24.83
6	62.92	0	5.25	0	10.78	20.73	14.09	4.15	0	9.67	0	0	0	0	0	0.83	17.41	0	6.36	0	3.04	0	0	0	0	17.41	8.57	0	24.04	0	4.15	0.83	8.57	5.25	0	0	0	14.09	21.83	1.93	21.83	7.46	17.41	0	18.52	30.68	12.99	15.2	10.78
7	62.92	2.37	17.85	1.42	7.11	24.8	27.96	21.01	14.06	27.33	13.43	19.11	14.06	4.58	3.32	3.95	19.74	12.79	13.43	4.58	15.95	7.11	3.32	8.37	9.63	26.06	15.95	5.84	27.33	2.69	15.95	8.37	11.53	5.84	1.42	0.79	3.95	14.06	22.27	7.11	23.53	15.32	16.58	3.32	11.53	27.96	15.32	18.48	15.32
8	62.92	9.93	29.45	6.45	14.81	75.47	52.46	23.18	18.3	28.76	14.81	28.76	18.3	12.03	7.84	8.54	35.73	42.7	31.55	14.81	34.33	26.67	19	21.09	9.93	15.51	10.63	22.48	71.28	10.63	33.64	44.09	39.21	32.24	9.93	0.87	0.87	25.27	42	39.91	22.48	41.31	32.94	42	28.06	23.18	6.45	10.63	21.09
9	62.92	0	22.95	15.05	13.08	43.67	28.87	22.95	19	27.88	17.02	23.93	13.08	9.13	9.13	10.12	24.92	10.12	35.78	20.97	27.88	22.95	16.04	11.1	11.1	28.87	20.97	17.02	25.91	24.92	38.74	26.89	33.8	24.92	14.06	15.05	19.99	29.85	37.75	11.1	39.72	27.88	30.84	21.96	24.92	35.78	23.93	25.91	27.88
10	62.92	8.96	6.69	5.18	8.71	15.28	10.23	13.76	12.25	12.25	9.22	7.2	5.18	3.16	2.65	4.67	7.2	4.17	10.23	8.21	7.2	5.68	4.67	4.17	4.17	3.66	4.67	3.16	3.16	6.69	8.21	5.18	4.67	3.66	2.15	1.64	1.64	2.15	1.14	0	9.72	6.19	5.18	3.16	2.65	2.65	1.14	1.64	0.63
11	62.92	0	10.9	0	0	46.7	28.8	21.02	5.45	29.58	15.57	28.02	0	0	0	0	22.57	4.67	31.91	1.56	16.35	10.9	1.56	0	0	12.45	7.01	4.67	35.8	14.01	42.81	18.68	18.68	13.23	0	0	0.78	18.68	32.69	83.28	45.92	17.12	22.57	9.34	7.78	31.13	14.79	12.45	20.24
12	62.92	0.86	19.06	0	1.89	52.73	17	16.32	22.5	38.99	12.88	30.06	13.57	5.32	3.26	6.7	30.06	6.01	34.18	21.12	30.06	24.56	14.94	11.51	4.64	20.44	13.57	17	34.18	27.99	52.04	32.8	38.99	29.37	5.32	7.39	10.13	28.68	43.8	20.44	63.72	39.67	41.73	30.74	24.56	27.99	23.87	17	26.62
13	62.92	0	22.33	10.12	15.26	42.25	19.76	12.05	8.19	21.69	13.33	26.18	19.76	21.04	25.54	31.32	49.32	28.75	26.83	11.41	22.97	21.69	24.26	28.11	29.4	55.1	49.32	45.46	61.52	12.05	37.11	28.11	35.18	41.61	32.61	35.82	44.18	60.88	71.81	46.1	32.61	24.26	31.32	31.32	41.61	66.02	53.81	57.03	63.45
14	62.92	0	12.9	5.91	11.15	43.52	17.28	43.52	16.4	16.4	5.03	10.28	4.16	6.78	12.9	15.53	34.78	16.4	38.27	18.15	21.65	13.78	11.15	5.03	11.15	60.15	35.65	19.9	35.65	28.65	36.53	28.65	26.9	63.65	6.78	10.28	41.77	33.9	40.02	18.15	64.52	34.78	57.52	26.9	23.4	47.02	27.78	40.02	64.52
15	62.92	9.87	17.37	4.74	3.95	30.01	15.79	48.17	31.59	33.17	19.74	23.69	13.43	3.95	1.58	2.37	18.16	13.43	45.02	26.06	29.22	18.95	15.79	7.11	4.74	14.22	12.64	8.69	28.43	33.17	39.49	29.22	22.9	42.65	4.74	1.58	15.01	14.22	19.74	12.64	45.81	24.48	39.49	16.58	15.79	20.53	8.69	13.43	30.8
16	62.92	20.11	28.48	18.83	18.18	25.26	27.19	25.26	33.63	43.93	41.35	36.21	24.62	23.33	18.83	16.25	37.49	8.53	27.19	21.4	36.85	40.07	43.93	23.98	20.11	33.63	18.18	13.03	20.76	7.24	34.92	22.69	28.48	29.77	22.69	22.69	23.33	13.68	8.53	0	24.62	19.47	17.54	8.53	18.83	34.92	13.68	11.75	7.24
17	62.92	7.91	23.73	19.51	27.94	45.87	23.73	14.24	20.56	32.16	23.73	26.89	20.56	21.62	23.73	27.94	41.65	15.29	14.24	12.13	23.73	19.51	16.34	17.4	16.34	34.27	27.94	20.56	32.16	0.53	21.62	16.34	20.56	17.4	3.69	4.75	15.29	23.73	26.89	4.75	22.67	13.18	20.56	12.13	18.45	32.16	22.67	23.73	15.29
18	62.92	0	4.35	0	0	5.26	14.41	45.53	32.72	25.4	0	4.35	0	0	0	0	10.75	0	50.1	33.63	31.8	0	0	0	0	16.24	2.52	0	25.4	12.58	34.55	8.01	6.18	0	0	0	0	0	19.9	0	43.7	21.73	23.57	0	5.26	28.14	3.43	1.6	0.69
19	62.92	0	6.52	0	7.09	36.56	11.62	39.96	29.19	38.83	17.29	15.02	0	0.28	8.79	17.29	35.99	16.15	54.13	34.29	40.53	26.36	9.92	4.25	3.68	33.16	30.32	29.76	43.36	39.96	62.07	44.5	39.39	29.19	9.92	13.89	20.69	40.53	50.16	26.92	62.07	46.2	47.9	34.29	35.43	49.03	35.43	36.56	40.53
20	62.92	8.72	21.85	8.48	9.91	23.28	9.43	48.59	32.83	35.22	18.5	25.19	16.59	11.82	10.39	10.86	15.64	4.18	50.02	25.19	26.62	21.37	17.07	15.16	11.34	18.5	14.68	9.91	15.64	29.01	39.52	26.62	29.01	28.53	13.73	10.86	10.39	16.59	17.55	5.13	35.7	23.76	28.53	23.76	24.24	28.53	19.94	15.64	16.59
21	62.92	13.46	21.6	9.56	8.14	20.89	3.19	18.77	21.6	27.27	18.06	21.6	13.1	9.56	6.02	7.44	12.39	0	23.02	15.23	22.31	15.23	8.85	6.73	6.73	22.31	10.98	0	6.73	11.69	27.98	20.89	20.89	14.52	7.44	4.6	4.6	7.44	10.27	0	34.35	25.14	25.14	12.39	17.35	27.27	14.52	15.94	6.02
22	62.92	0	12.2	0	0.81	36.61	51.26	0	0	8.95	0	2.44	0	0	0	0	38.24	13.83	12.2	0	2.44	0	0	0	0	28.48	17.09	0	44.75	0	33.36	2.44	4.07	0	0	0	0	4.07	39.87	4.07	41.49	17.09	26.85	0	13.83	34.98	7.32	13.83	4.07
23	62.92	0	4.3	0	0	14.88	0	38.68	4.3	12.23	0	1.65	0	0	0	0	10.25	0	36.69	0	11.57	0	0	0	0	6.94	3.64	0	25.45	5.62	28.76	10.25	5.62	30.74	0	0	4.96	8.93	23.47	7.6	34.71	6.94	30.74	4.3	6.94	16.86	7.6	8.26	43.3
2	62.92	0.43	25.48	9.07	11.66	31.53	35.85	26.35	19.44	32.39	9.93	16.84	6.48	0	0	0.43	20.3	3.89	24.62	8.21	19.44	3.02	0	0	0	9.93	2.16	0	21.16	11.66	29.8	13.39	10.8	0	0	0	0	0	10.8	0	40.17	24.62	22.89	0	9.07	22.03	4.75	3.02	1.3
2	62.92	14.54	17.01	3.29	4.39	21.4	4.94	10.97	26.34	37.86	24.14	32.92	21.4	4.94	4.39	4.94	15.91	0	25.79	23.59	34.57	29.63	23.59	18.11	10.97	23.59	14.81	7.13	16.46	12.07	44.99	34.57	35.12	30.18	16.46	14.81	15.91	21.95	27.43	6.04	36.21	29.08	40.05	26.34	31.28	46.64	34.02	28.53	25.24
26	62.92	7.38	23.56	8.8	7.66	29.23	15.04	3.12	12.77	24.13	12.77	17.88	10.5	9.37	8.23	6.53	18.45	7.66	5.96	3.69	15.04	6.53	4.26	3.12	5.96	21.86	12.77	8.23	24.13	0	16.18	13.91	11.64	8.23	0	4.26	13.91	20.15	25.83	12.77	3.69	8.23	17.31	7.1	10.5	22.99	18.45	25.83	30.94
27	62.92	0	0	0	0	0	0	14.85	5.27	9.1	0	4.31	0	0	0	0	0	0	13.89	0	6.23	0	0	0	0	9.1	0	0	5.27	2.4	24.43	4.31	5.27	0.48	0	0	0	0	9.1	0	26.35	14.85	22.52	0	18.68	25.39	9.1	7.19	3.35
28	62.92	17.95	32.21	18.48	22.17	35.37	40.65	9.5	21.12	34.32	38.01	40.13	28.51	26.93	25.34	23.23	46.46	25.34	18.48	14.78	32.21	39.07	42.24	25.87	23.23	38.01	29.04	33.79	45.41	4.75	35.9	30.09	33.26	34.85	32.21	41.18	40.13	42.24	40.65	22.7	30.09	25.87	33.79	27.45	39.07	54.38	42.77	42.77	42.24
29	62.92	0	7.6	0	6.76	42.23	29.56	30.4	20.27	22.8	12.67	13.51	5.07	0	0	7.6	38	24.49	20.27	10.98	18.58	10.13	10.13	0	0.84	14.36	16.89	18.58	46.45	10.98	27.02	21.11	16.05	54.05	5.91	5.07	28.71	36.31	37.16	35.47	37.16	16.05	41.38	15.2	19.42	30.4	16.89	24.49	60.81
30	62.92	1.74	8.06	0	0	0	0	21.14	22.45	26.81	16.35	19.83	7.19	0.65	0	0	0	0	29.86	18.09	21.58	13.73	11.12	10.24	6.76	8.5	0	0	0	24.19	40.76	23.76	20.71	23.76	9.37	9.81	6.32	4.14	1.96	0	54.27	39.01	32.48	22.01	22.89	35.09	27.68	18.96	10.68
31	62.92	0	0	0	0	0	0	0	2.8	19.59	14.61	15.24	0.93	0	0	0	19.59	0	2.18	5.91	22.7	23.94	21.46	6.53	3.42	13.99	12.75	13.99	31.41	0.31	28.3	20.83	10.26	29.54	15.86	25.19	27.05	23.32	23.94	10.26	15.24	15.86	23.32	15.24	26.43	42.6	28.92	28.3	25.81
Controls
1	62.92	0	5.88	0	0	19.1	20.56	4.41	11.75	39.66	26.44	17.63	2.94	0	0	0	24.97	0	8.81	0	29.38	10.28	2.94	1.47	8.81	23.5	5.88	2.94	32.32	0	26.44	8.81	0	0	11.75	44.07	36.72	19.1	16.16	1.47	17.63	2.94	11.75	0	0	7.34	4.41	11.75	27.91
2
3	62.9167	0	7.10349	2.36783	4.3974	15.8983	7.78002	1.69131	9.80959	19.2809	19.2809	19.9574	5.07392	7.10349	2.36783	3.04435	17.2513	0	3.72088	0	10.4861	21.3105	16.5748	5.07392	3.04435	21.987	6.42697	7.10349	1.69131	0	6.42697	6.42697	25.3696	10.4861	5.07392	10.4861	11.8392	11.8392	7.78002	0	0	0	0	0.338262	2.36783	25.3696	9.13306	9.80959	5.75045
4	62.92	6.92	6.92	5.26	5.81	13.56	17.99	11.9	17.99	19.1	13.56	8.58	5.81	6.37	5.26	5.81	10.24	11.35	6.37	8.03	8.58	4.15	1.38	0.83	1.38	5.26	4.15	5.26	14.11	0	1.94	0.83	0	0	0	0	0	0	0.83	4.15	4.15	0.83	0.28	0	0	0	0	0	0
5	62.92	0	19.75	0	6.58	24.14	40.24	24.14	27.07	31.46	15.36	2.19	0	0	0	0	24.14	0	18.29	5.12	6.58	0	0	0	0	0	0	0	19.75	0	21.22	0	0	0	0	0	0	0	0	0	15.36	0	0	0	0	5.12	0	0	0
6	62.92	6.92	6.92	5.26	5.81	13.56	17.99	11.9	17.99	19.1	13.56	8.58	5.81	6.37	5.26	5.81	10.24	11.35	6.37	8.03	8.58	4.15	1.38	0.83	1.38	5.26	4.15	5.26	14.11	0	1.94	0.83	0	0	0	0	0	0	0.83	4.15	4.15	0.83	0.28	0	0	0	0	0	0
7	62.92	0	8.52	1.39	6.14	37.04	9.31	19.61	16.44	20.4	9.31	14.06	6.14	2.97	3.76	7.72	25.15	7.72	19.61	8.52	11.69	3.76	2.18	0	3.76	18.02	14.06	12.48	27.53	8.52	17.23	8.52	10.89	9.31	1.39	6.93	12.48	22.78	28.32	12.48	21.19	8.52	11.69	6.93	12.48	21.98	16.44	21.19	27.53
8	62.92	0	0	0	0	23.51	0	24.85	11.42	20.15	0.67	9.4	0	0	0	0	14.78	0	47.69	16.79	20.15	9.4	2.69	0	0	18.14	8.73	0	33.59	40.3	59.11	27.54	32.24	25.52	1.34	0	0	19.48	28.88	4.03	82.62	47.69	46.35	24.18	29.56	44.33	23.51	24.18	38.29
9	62.92	0	13.41	0	0	10.66	0	25.79	31.97	47.79	29.91	38.16	17.53	5.16	0	0	4.47	0	49.85	39.54	43.66	34.72	28.54	22.35	12.72	25.79	8.6	0	5.84	29.91	72.54	47.79	47.79	42.29	18.91	15.47	11.35	14.78	12.03	0	51.91	47.1	53.29	38.16	36.79	47.1	34.04	23.04	14.78
10	62.92	5.92	40.33	16.67	23.12	63.99	44.63	0	0	0	0	16.67	8.07	0	0	0	20.97	3.76	0	0	0	0	0	0	0	12.37	0	0	16.67	0	0	0	0	8.07	0	0	0	0	0	0	0	0	0	0	0	33.88	5.92	5.92	0
11	62.92	4.95	17.9	4.7	3.68	9.27	18.91	8.76	9.27	20.44	20.94	23.48	17.39	12.31	5.71	9.27	25.51	12.82	21.96	9.27	35.16	23.48	33.64	12.82	11.3	22.47	17.9	15.87	31.61	20.94	36.68	23.99	17.9	38.71	16.37	22.97	29.07	19.93	19.42	9.77	44.81	25.51	33.13	15.87	27.54	30.59	17.9	17.9	24.5
12	62.92	0.64	17.54	10.52	16.9	31.56	34.75	1.59	0.96	9.88	10.52	10.52	7.97	9.88	10.52	11.8	48.14	16.9	7.33	0.32	9.88	12.43	15.62	5.42	9.25	23.91	16.9	24.55	48.14	0.32	15.62	6.7	6.06	9.88	6.7	23.91	32.84	32.2	32.2	17.54	13.07	5.42	11.16	5.42	9.88	30.29	19.45	19.45	28.38
13	62.92	6.73	29.35	8.89	6.73	12.12	2.42	55.2	41.2	50.89	47.66	48.74	31.5	27.2	18.58	12.12	42.27	4.58	73.51	42.27	68.12	58.43	69.2	26.12	23.96	37.97	25.04	18.58	28.27	44.43	82.12	61.66	44.43	76.74	27.2	47.66	59.51	28.27	18.58	0	82.12	48.74	59.51	29.35	55.2	57.35	29.35	22.89	23.96
14	62.92	5.7	18.23	9.11	9.87	14.43	12.15	0	5.32	16.71	19.75	20.51	15.95	13.67	10.63	9.11	34.94	6.08	9.11	5.32	18.23	23.55	23.55	9.87	12.91	28.1	15.95	15.19	28.1	6.08	25.07	12.91	15.19	17.47	14.43	25.07	34.18	23.55	18.99	6.84	26.58	15.19	18.99	9.11	16.71	42.54	18.23	15.95	15.19
15	62.92	30.23	36.66	27.01	24.44	21.87	16.72	18.01	25.72	36.66	35.37	45.66	28.94	27.01	20.58	15.43	27.01	3.22	16.08	16.72	27.01	33.44	29.58	19.29	17.36	25.08	13.51	5.79	14.79	5.14	30.23	20.58	19.29	19.29	15.43	21.87	23.15	20.58	11.58	0	19.29	18.01	24.44	17.36	23.79	36.66	22.51	22.51	18.65
[truncated: 33 more columns]

## Sheet: Plasma
Patient	Pos	Neg	ENA-78	G-CSF	GM-CSF	GRO	GRO-alpha	I-309	IL-1alpha	IL-1beta	IL-2	IL-3	IL-4	IL-5	IL-6	IL-7	IL-8	IL-10	IL12-p40	IL-13	IL-15	IFN-gamma	MCP-1	MCP-2	MCP-3	M-CSF	MDC	MIG	MIP-1 beta	MIP-1-delta	RANTES	SCF	SDF-1	TARC	TGF-beta 1	TNF-alpha	TNF-beta	EGF	IGF-1	Angiogenin	Oncostatin M	TPO	VEGF	PDGF-BB	Leptin	BDNF	BLC	CK beta 8-1	Eotaxin
1	62.92	3.37	13.48	2.25	1.5	13.48	0	16.48	17.23	28.46	19.47	22.47	11.98	6.74	3	0	2.25	0	24.72	7.49	17.98	13.48	10.49	8.99	8.24	16.48	0	0	0	2.25	30.71	14.23	24.72	16.48	8.24	5.99	3.75	3.75	0	23.22	29.21	20.22	22.47	13.48	20.97	36.7	21.72	14.98	6.74
2	62.92	0	7.77	0	0	13.6	6.48	0	3.89	19.43	14.89	9.71	5.83	1.94	0	0	4.53	0	0	0	6.48	10.36	12.95	5.18	5.18	11.66	3.24	0	7.77	0	0	0	6.48	16.19	16.19	8.42	3.89	9.71	9.07	24.61	1.94	0	3.24	1.94	13.6	35.61	36.26	23.96	14.25
3	62.92	1.27	13.41	0	0.99	15.67	16.24	27.53	15.67	27.53	14.54	21.32	9.46	0	0	3.81	23.01	10.02	32.61	11.72	20.75	13.98	8.89	4.94	2.12	23.01	15.67	10.02	34.31	22.45	32.61	20.19	21.88	15.67	0	0	6.64	13.41	21.88	13.41	41.08	20.19	24.71	12.85	14.54	23.58	11.72	15.11	20.75
4	62.92	0	5.25	0	0	4.02	0	6.49	6.49	22.55	10.19	11.43	2.78	0	0	0	0	0	16.37	4.02	17.61	11.43	2.78	0.31	0.31	10.19	0	0	0.31	4.02	27.49	13.9	18.84	12.67	4.02	2.78	4.02	1.54	4.02	0	36.14	18.84	17.61	7.72	16.37	26.26	16.37	13.9	2.78
5	62.92	0.2	11.1	2.22	9.49	30.48	21.6	0	0	10.3	5.45	12.72	5.45	2.22	3.03	7.87	24.02	14.33	0	0	6.26	6.26	5.45	7.07	7.07	20.79	15.95	12.72	28.06	0	11.91	7.87	13.53	14.33	11.91	12.72	16.76	20.79	28.06	12.72	10.3	7.87	17.56	10.3	19.99	28.87	27.25	28.87	24.83
6	62.92	16.42	18.85	16.42	12.37	24.53	5.07	0	5.07	18.04	20.48	28.59	21.29	23.72	18.04	13.99	18.04	3.45	0	3.45	13.99	22.1	32.64	23.72	23.72	24.53	19.67	14.8	13.99	5.88	145.36	13.18	20.48	30.21	20.48	22.1	29.4		19.67	57.78	0	5.07	13.99	35.88	18.04	65.89	20.48	23.72	16.42
7	62.92	10.76	14.22	5.77	1.15	8.84	9.61	0	6.54	10.38	8.84	10.38	8.07	4.23	4.23	1.92	6.54	5.77	4.23	5.77	9.61	8.84	6.54	2.69	0.38	1.92	1.92	6.54	18.84	3.46	84.96	7.3	6.54	1.92	0	0	1.15		4.23	48.05	1.92	2.69	6.54	6.54	37.29	7.3	1.15	1.15	1.15
8	62.92	0.5	5.04	2.52	3.02	7.56	1.51	0	0	0	0.5	1.51	1.51	1.01	2.02	4.54	3.53	1.51	1.51	0	0	0.5	6.55	0	1.01	0.5	2.52	2.02	4.54	20.16	105.84	1.01	1.51	1.51	1.01	1.01	0		0.5	113.4	0.5	0.5	0.5	2.02	82.66	4.03	1.51	2.02	2.52
9	62.92	0.23	2.81	3.28	0	6.1	0	0	0	6.1	3.75	7.03	4.69	2.34	0.47	0	0	0	0	2.81	1.88	6.1	15.94	6.57	6.57	2.81	0.47	0	4.22	12.66	90.04	7.97	10.32	16.41	8.91	6.57	4.69		0	33.76	6.1	10.32	15.01	20.16	80.66	50.65	6.1	3.28	0
10	62.92	0	12.08	16.25	0	3.75	0	18.75	29.58	38.75	40.42	41.25	28.75	22.92	31.25	7.08	2.08	0	23.75	33.75	39.58	47.92	62.08	44.58	37.92	34.58	13.75	0	0	44.58	165.42	49.58	45.42	47.08	17.08	15.42	10.42		7.92	32.08	19.58	32.08	38.75	42.92	30.42	70.42	4.58	0	0
11	62.92	3.54	3.07	2.13	0	0.24	0	7.8	8.74	12.52	12.52	19.13	13.47	10.63	8.74	7.8	10.63	0	6.85	6.85	11.58	18.19	26.69	20.08	21.02	20.08	16.3	11.58	12.52	12.52	106.07	17.24	16.3	25.75	18.19	21.02	21.02		19.13	52.21	6.85	7.8	13.47	21.97	101.34	36.14	19.13	19.13	13.47
12	62.92	2.16	2.84	1.48	2.39	8.3	3.75	0	1.93	3.75	3.3	2.84	1.48	0.57	1.48	1.02	3.3	1.48	0	6.48	4.66	2.39	8.75	0.11	0.57	1.02	0.57	2.39	6.48	20.57	103.75	12.84	2.84	1.93	2.84	1.02	1.48		4.66	73.3	1.02	8.3	4.2	6.02	1.02	16.48	0.57	0.11	1.48
13	62.92	9.91	15.32	12.61	8.11	10.81	9.01	0	6.31	9.01	11.71	16.22	12.61	13.51	11.71	11.71	13.51	5.41	0	8.11	7.21	12.61	17.12	13.51	12.61	12.61	14.42	10.81	17.12	12.61	41.44	5.41	7.21	9.91	10.81	9.91	10.81		9.91	64.87	82.89	0.9	6.31	5.41	8.11	17.12	9.01	9.01	12.61
14	62.92	4.04	4.42	2.54	0	2.16	0	0	0	3.66	2.16	2.91	2.91	1.03	1.41	0	0	0	0	0	0	0	5.17	1.79	3.66	1.79	2.16	0	3.66	24.33	72.81	0.28	1.03	2.91	0	0	0	12.31	1.79	46.88	6.67	0	0	1.03	1.03	0	0.28	0	0
15	62.92	10.02	14.35	7.85	12.19	40.89	5.15	0	0	0.81	4.6	5.69	7.31	10.56	12.19	13.27	10.02	4.6	0	0	0.27	3.52	5.69	10.56	15.44	20.31	17.06	13.81	18.14	8.39	100.47	4.06	4.06	3.52	6.77	11.1	15.98	31.14	17.6	97.22	8.39	2.44	0	0.81	2.98	10.02	99.38	17.06	85.3
16	62.92	5.68	5.45	0	0	8.76	0	0	1.18	10.66	7.34	6.87	6.87	2.61	0	0	0	0	0	1.66	4.97	10.18	6.87	4.97	4.97	0	0	0.24	6.87	5.45	92.13	1.66	6.39	2.13	0	1.18	0	0	0	65.13	5.92	0.71	0.71	4.97	1.18	11.6	95.91	4.03	67.02
17	62.92	0	32.24	7.94	4.96	45.14	0	0	0	0	0	0	2.48	6.94	16.87	1.49	1.98	0	0	0	0	0	0.5	0	0	0	0	0	1.98	0	0	0	0	38.69	7.94	8.93	0	0	2.98	13.89	7.94	103.68	1.98	3.47	4.96	7.44	6.94	0	44.15
18	62.92	0.59	2.96	0	0	32.82	0.12	0	0	1.54	3.44	1.54	0.12	0	0.12	0	0	0	0.12	0.59	1.07	3.44	2.96	1.07	1.07	0.59	0	0.12	19.55	3.91	93.96	1.54	1.54	5.33	1.07	2.96	2.01	14.34	5.81	48.46	25.24	5.33	1.54	0.12	0.12	9.12	106.76	11.97	84.01
19	62.92	2.96	12.52	0	0	40.76	2.5	0.68	7.51	14.34	15.25	18.44	11.16	5.69	2.5	2.05	2.05	0	7.97	5.69	16.17	22.54	18.44	13.89	14.8	16.17	9.79	5.69	23.91	15.71	52.59	16.17	21.17	30.28	17.99	20.26	19.35	23.45	27.55	80.37	38.48	14.8	17.08	16.17	70.35	37.57	97.68	23.91	75.82
20	62.92	0.52	3.4	0	0.1	35.15	0.52	0	0.93	4.23	2.58	2.58	1.34	0.1	0.52	0.52	0.93	0.1	1.75	0.52	3.4	5.05	3.81	2.16	2.16	3.4	1.34	1.34	21.54	5.88	80.1	4.23	4.23	6.7	2.58	7.11	5.05	24.43	11.24	61.95	32.68	5.88	2.16	2.58	3.81	17.83	96.18	15.36	73.91
21	62.92	5.15	7.66	0	0.42	6.55	2.09	0	1.53	8.22	8.78	17.69	3.76	0.98	2.09	1.53	7.66	0.98	1.53	1.53	5.43	11.56	22.71	7.66	11	4.32	8.78	14.9	28.83	21.03	92.36	6.55	12.68	13.23	2.65	2.65	4.32	13.79	22.71	90.68	16.02	3.2	4.88	5.99	6.55	7.1	0.98	10.45	2.65
22	62.92	0.62	2.71	0	0	2.71	0.21	3.54	5.2	8.53	6.04	10.2	4.37	1.04	0.21	0.21	1.04	0	9.36	9.36	7.7	8.53	8.53	6.87	6.04	1.04	0.21	2.71	8.53	46.82	160.86	15.19	11.86	6.87	2.71	2.71	2.71	20.19	11.03	71.8	28.51	17.69	11.03	8.53	14.36	7.7	3.54	4.37	1.87
23	62.92	0.58	5.83	0	0	4.08	0	0	0	1.17	3.5	18.06	4.08	4.66	8.74	3.5	6.41	0	11.65	13.98	0	13.4	19.22	19.81	20.39	11.65	4.66	11.07	23.3	51.85	128.75	26.22	16.31	15.73	8.16	14.56	14.56	72.24	30.29	95.54	40.2	31.46	26.22	19.81	16.31	30.29	17.48	20.39	16.31
2	62.92	0	0	0	0	0	0	0	0	0.91	3.73	0	0	0	0	0	0	0	0	9.37	1.71	3.73	24.29	1.71	0	0	0	0	2.12	23.08	73.87	46.46	0.5	0.91	0	0	0	48.07	0	62.18	4.13	6.55	4.53	6.55	1.71	3.33	0	0	0
2	62.92	6.73	45.83	17.63	16.34	35.57	18.91	25.32	22.75	33.01	17.63	31.73	31.73	33.01	41.98	39.42	47.11	0.96	40.7	27.88	33.01	22.75	26.6	33.01	31.73	43.26	39.42	44.54	31.73	40.7	232.97	49.67	31.73	24.03	16.34	17.63	21.47	117.61	17.63	217.59	39.42	58.64	38.13	43.26	26.6	89.41	29.16	24.03	13.78
26	62.92	1.75	6.01	2	1.5	30.54	0	0	4.51	12.02	12.02	12.52	8.01	6.01	8.01	7.51	12.52	4.01	2.5	10.01	15.52	16.52	26.54	8.51	8.01	9.01	14.52	15.52	35.05	11.01	121.66	24.53	17.52	21.03	9.51	5.51	8.01	80.61	23.53	121.16	12.02	19.53	21.03	30.04	12.02	23.53	12.52	10.51	10.01
27	62.92	0	0	0	0	2.54	0	0	0	3.39	3.39	2.54	0	0	0	0	7.62	0	0	0	0	0.85	12.7	0	0	0	0	0	9.73	3.81	83.37	2.96	0	0	0	0	0	24.55	0	75.75	8.04	1.69	1.27	0	0	0	0	1.27	0
28	62.92	1.21	1.04	0	0.35	7.94	3.11	2.76	5.18	5.87	8.63	4.14	2.07	0.69	1.04	0.35	7.6	3.8	3.45	3.8	4.14	7.25	12.78	1.73	0.35	0.35	0.35	3.45	17.27	6.91	70.46	3.45	1.73	0.35	0	0.35	1.38	12.09	4.49	71.15	6.91	0	0.69	0	0	0	0	0	0
29	62.92	0.7	5.89	2.89	2.88	8.2	1.74	0	0	0.2	0.7	1.32	1.76	1.2	1.81	5.68	3.94	1.31	1.55	0	0	0.4	6.55	0.9	0.99	0.78	2.22	2.43	4.89	18.18	95.4	0.82	1.21	1.72	0.74	1.3	0	0	0.38	100.08	0.9	1.04	1.01	1.88	73.57	5.11	1.33	1.59	1.84
30	62.92	0.56	0.19	0	0	6.88	0	6.88	7.62	6.88	6.14	3.53	1.3	0.56	0.93	0.56	0.56	0	3.91	3.53	3.91	4.28	3.53	2.79	2.42	2.42	1.3	1.3	5.76	11.72	35.15	3.91	4.28	3.91	3.16	7.62	3.91	8	2.79	54.86	6.14	9.48	4.65	3.53	7.62	7.62	79.78	12.83	77.17
31	62.92	9.67	15.74	3.6	5.88	10.43	13.47	0	5.88	26.37	27.13	33.96	18.02	8.92	2.09	0	20.3	5.88	13.47	9.67	46.86	32.44	46.1	8.92	11.19	26.37	8.16	2.09	25.61	12.71	44.58	34.71	30.92	55.2	22.57	36.99	49.89	21.06	9.67	11.95	46.1	21.82	40.03	27.89	52.17	52.93	33.2	35.47	33.96
Controls
1	62.92	2.52	6	5.23	0	0	0	4.45	3.68	4.45	6.78	2.9	4.45	2.9	6	1.36	0.58	0	4.45	7.55	2.9	2.13	2.9	3.68	2.9	2.9	2.13	0	0	0	162.42	5.23	1.36	2.9	2.13	2.9	1.36	0	0	22.26	0	2.13	0	2.9	16.07	13.74	1.36	2.9	0
2	62.92	3.05	7.56	0	0	1.45	0	3.7	4.34	4.98	4.02	4.02	0.8	0	0	0	0	0	1.77	1.77	1.13	0	2.41	0	0	0	0	0	0.48	9.81	69.62	4.34	0	0	0	0	0	4.34	0	47.43	7.56	5.31	0	0.8	0	10.45	0	0	0
3	62.92	0	3.5	1.64	1.64	6.31	3.5	29.67	0.7	0	0	0	0	0	0	0	0.23	0	2.1	0.7	0.23	0	0	0	0	0	0.23	0.23	3.5	8.18	110.03	2.57	0.23	1.17	0	0	0	64.71	4.91	62.84	5.84	3.5	0.7	9.58	17.05	32	2.1	3.5	3.97
4	62.92	2.95	4.09	2.95	4.09	3.71	0	0	1.43	2.95	2.95	3.33	0.29	0	1.05	1.05	0.29	0	0.29	1.05	0.67	1.05	6.37	0.67	1.43	1.43	0	0	1.81	9.03	83.2	2.19	0.67	2.19	0	0.29	0	9.41	1.43	52.77	0	0	0	2.57	63.42	17.02	0	1.81	0
5	62.92	1.88	2.71	0.21	0	2.29	0	0	0	1.46	1.04	3.54	1.04	0.63	0	0	0	0	0	0	0.63	0	4.38	2.71	1.88	1.88	0.63	1.46	1.04	4.79	88.54	0.63	0.21	3.13	2.29	1.88	1.88	8.54	1.88	40.63	2.71	0	0.21	0.63	2.29	7.29	1.46	1.46	0
6	62.92	2.57	5.56	2.14	0.86	4.28	1.28	0.43	2.14	5.14	3.42	5.99	3.85	2.57	1.28	0.43	0.43	0	0	0	0.86	3.85	7.7	3.42	3	3	1.71	0.86	3	5.99	80.04	2.14	1.71	2.57	0.43	1.28	1.71	6.85	3.85	54.78	7.7	1.28	1.28	3.85	6.85	11.98	0.86	5.56	1.71
7	62.92	7.35	4.09	0	0	0	0	4.09	8.44	12.8	14.98	17.16	8.44	6.26	5.17	3	4.09	0	6.26	11.71	16.07	16.07	23.7	16.07	12.8	9.53	0.82	0	0	11.71	134.82	20.43	13.89	18.25	12.8	9.53	3	0	0	42.22	8.44	17.16	18.25	20.43	19.34	62.92	8.44	6.26	0
8	62.92	0	0	0	0	0	0	0	3.01	8.57	7.18	1.16	0	0	0	0	0	0	0	0	0	0.69	3.47	0	0	0	0	0	0	2.55	88.24	0	0	0	0	0	0.69	6.25	0	20.15	17.83	0.69	0	0	0	11.35	0	0	0
9	62.92	0	2.02	0	0	0.74	0	0.74	2.02	2.44	2.02	0.74	1.17	0	0.32	0	4.99	0.32	1.59	2.02	1.17	2.02	4.99	0.74	1.17	2.02	1.17	1.17	2.02	5.42	85.29	1.59	1.17	1.59	1.59	2.02	1.59	61.5	3.29	24.96	2.87	1.17	0.74	6.27	9.67	28.79	0.74	2.87	1.59
10	62.92	0	25.41	0	0	34.74	21.78	32.67	23.85	46.15	21.26	40.45	19.7	6.22	0	2.07	23.33	6.22	52.89	21.78	31.63	21.26	21.78	19.7	10.37	33.19	21.26	11.93	40.96	24.89	50.3	31.63	32.15	35.26	9.85	9.33	17.63	39.41	38.37	19.7	48.74	26.45	28.52	18.67	20.74	41.48	32.15	30.59	45.11
11	62.92	3.53	19.98	13.4	20.92	32.67	32.67	4.94	13.4	19.04	14.34	15.28	5.41	0.71	1.65	5.41	33.14	15.75	8.23	2.12	16.22	8.23	16.69	0	2.12	15.75	17.63	6.35	22.8	0	14.34	5.41	1.65	19.04	4.94	20.92	37.37	25.62	11.52	10.58	4.94	0	9.64	1.18	15.75	19.98	20.45	28.44	28.91
12	62.92	0	9.63	0	0	3.47	1.93	0	0	16.56	16.56	13.48	5.78	1.93	0	0	22.73	0	1.93	0	15.02	15.79	21.19	1.16	1.16	11.94	0.39	1.16	13.48	0	18.1	8.09	9.63	10.4	0.39	12.71	18.88	11.94	7.32	2.7	15.79	4.24	13.48	6.55	11.17	36.59	8.86	7.32	11.17
13	62.92	19.12	41.71	22.94	26.42	36.85	41.02	22.25	28.5	43.1	46.58	47.97	32.67	28.5	25.03	21.55	59.79	25.03	34.76	16.69	44.49	45.88	59.09	25.03	24.33	45.88	27.81	28.5	45.88	18.08	47.27	34.07	31.98	59.09	25.03	45.88	57.7	34.76	28.5	21.55	47.27	22.25	40.32	21.55	48.66	54.92	32.67	29.2	36.85
14	62.92	0	19.04	5.54	8.44	16.15	21.94	0	0	11.33	19.04	24.83	17.12	15.19	11.33	9.4	56.65	1.69	0	0	13.26	25.79	33.51	8.44	10.37	33.51	18.08	21.94	53.76	0	17.12	5.54	12.29	15.19	10.37	30.61	40.26	30.61	30.61	37.36	5.54	0	8.44	0.72	11.33	53.76	16.15	15.19	20.01
15	62.92	30.23	36.66	27.01	24.44	21.87	16.72	18.01	25.72	36.66	35.37	45.66	28.94	27.01	20.58	15.43	27.01	3.22	16.08	16.72	27.01	33.44	29.58	19.29	17.36	25.08	13.51	5.79	14.79	5.14	30.23	20.58	19.29	19.29	15.43	21.87	23.15	20.58	11.58	0	19.29	18.01	24.44	17.36	23.79	36.66	22.51	22.51	18.65
[truncated: 33 more columns]
