# Supplementary material for: Cytokine-Laden Extracellular Vesicles Predict Patient Prognosis after Cerebrovascular Accident
Source: Int J Mol Sci. 2021 Jul 22;22(15):7847. doi: 10.3390/ijms22157847 (PMC8345931; doi:10.3390/ijms22157847)
Supplement: Supplementary file 1 [file ijms-22-07847-s001.zip › Supplemental Table S1 excel.xlsx]

## Sheet: Sheet1
Stroke Subject	Age	Gender	Ethnicity	BMI	Injury type	Edema Volume mm^3	Hunt and Hess Score	ICH Score	NIHSS	Fisher Score	GCS Score	Modified Rankin Scale at Discharge	GOS-E	Platelet Count (billion/L)
1	73	Male	White	24.8	IPH	17309.3	NA	1	10	NA	13	4	3	261
2	54	Male	White	31.53	SDH	46116.4	NA	NA	NA	NA	8	3	5	247
3	67	Male	White	26	SAH	400.234	2	1	NA	2	15	2	0	154
4	33	Male	Black	24.1	IPH	12482.9	NA	2	NA	NA	14	3	3	213
5	43	Male	White	31.45	SAH	6998.74	2	1	NA	3	15	1	0	239
6	73	Male	White	24.29	IPH	45055.4	NA	1	10	NA	13	4	3	145
7	65	Male	White	26.5	SDH, IVH, ICH	55989.1	NA	2	13	NA	3	4	5	188
8	58	Female	White	23.1	SDH, IVH, ICH	48856.5	NA	3	NA	NA	10	5	2	292
9	46	Female	White	26.1	IVH	64804.2	NA	3	25	NA	8	4	4	144
10	53	Male	White	27.2	SDH	61254.3	NA	NA	NA	NA	9	1	8	195
11	36	Female	White	27.5	IVH, ICH	74802.2	NA	3	NA	NA	8	4	4	373
12	75	Male	Black	21.7	SDH, SAH	3431.97	4	NA	8	NA	10	1	8	186
13	77	Male	Other	19.8	IVH, ICH	76792.2	NA	2	NA	NA	3	4	1	239
14	67	Male	Black	27.9	IVH	49150.6	NA	3	NA	NA	6	6	1	491
15	33	Male	Hispanic	27.5	SAH	1235.25	NA	3.5	0	NA	15	1	8	211
16	82	Female	White	24.3	IPH	11988.6	NA	3	3	NA	15	4	3	207
17	50	Male	Hispanic	26.5	SAH	861.668	5	NA	NA	4	3	6	1	466
18	21	Male	Other	20.8	SDH	27087.8	NA	NA	NA	NA	6	4	3	263
19	65	Male	White	39.4	ICH	51830.5	NA	4	NA	NA	10	6	1	337
20	60	Female	White	30	IVH	46706.2	NA	4	NA	NA	9	3	5	178
21	56	Male	Hispanic	18.1	IVH, ICH	17359	NA	2	2	NA	14	4	4	259
22	57	Male	Black	22.8	SAH	380	2	NA	28	4	14	2	7	395
23	50	Male	White	20.8	ICH	47173.9	4	1	NA	2	14	3	3	281
24	57	Female	White	25	SAH, IVH	50911.4	4	2	NA	4	7	3	5	266
25	93	Female	White	24.5	SDH	63375.5	NA	3	10	NA	13	3	6	197
26	59	Female	White	22.3	SAH	176.934	3	NA	NA	4	9	4	5	272
27	72	Female	White	26.7	SDH	44816	NA	3	NA	NA	15	2	1	176
28	81	Male	White	28.9	ICH	9152.93	NA	2	0	NA	14	5	3	166.5
29	63	Male	White	26.5	SDH, IVH, ICH	31730.4	NA	2	15	NA	9	5	2	293
30	43	Male	White	33.2	SAH	28905.7	2	1	0	3	15	1	8	243
31	56	Female	White	22.67	SDH	21384.3	NA	1	NA	NA	10	5	3	116
	Healthy Controls
Healthy Control	Age	Gender	Ethnicity
1	55	Female	White
2	57	Male	White
3	42	Male	White
4	45	Female	White
5	62	Male	White
6	77	Male	White
7	56	Male	White
8	30	Male	White
9 (Pool)	avg age 52	both	Pooled (White, Asian, Hispanic, Black)
10	22	Male	White
11	57	Male	White
12	44	Female	Asian
13	65	Female	White
14	58	Male	White
15	62	Female	White
